# Supplementary material
Source: PubMed Central journal article supplement (PMC3967041)
Supplement: supp_tpc.113.120014_tpc120014Supplemental.pdf [file supp_tpc.113.120014_tpc120014Supplemental.pdf]

Possible AIM sequences are indicated by the red brackets; whereas AIM1 is relatively conserved among ATG11 proteins, the AIM? sequence is more degenerate. A9SER7 and A9TRX9 are proteins from *P. patens*, D8STK2 and D8T567 from *S. moellendorffii*, B9HB54 from *P. trichocarpa*, Q9SUG7 from *A. thaliana*, C5XWU8 from *S. bicolor*, Q6ETK7 from *O. sativa*, Q54MY6 from *D. discoideum*, D0MQJ2 from *P. infestans*, F0W217 from *A. laibachii*, Q2UKQ2 from *A. oryzae*, B6H4J6 from *P. chrysogenum*, B0DBA9 from *L. bicolor*, Q9C438 from *P. pastoris*, Q12527 from *S. cerevisiae*, Q22342 from *C. elegans*, E1G2W6 from *L. loa*, Q17NR9 from *A. aegypti*, E7FFM2 from *D. rerio*, Q8TDK2 from *M. musculus*, Q9VNG5 from *D. melanogaster*, Q9ESK9 from *H. sapiens*, B3RY68 from *T. adhaerens*.



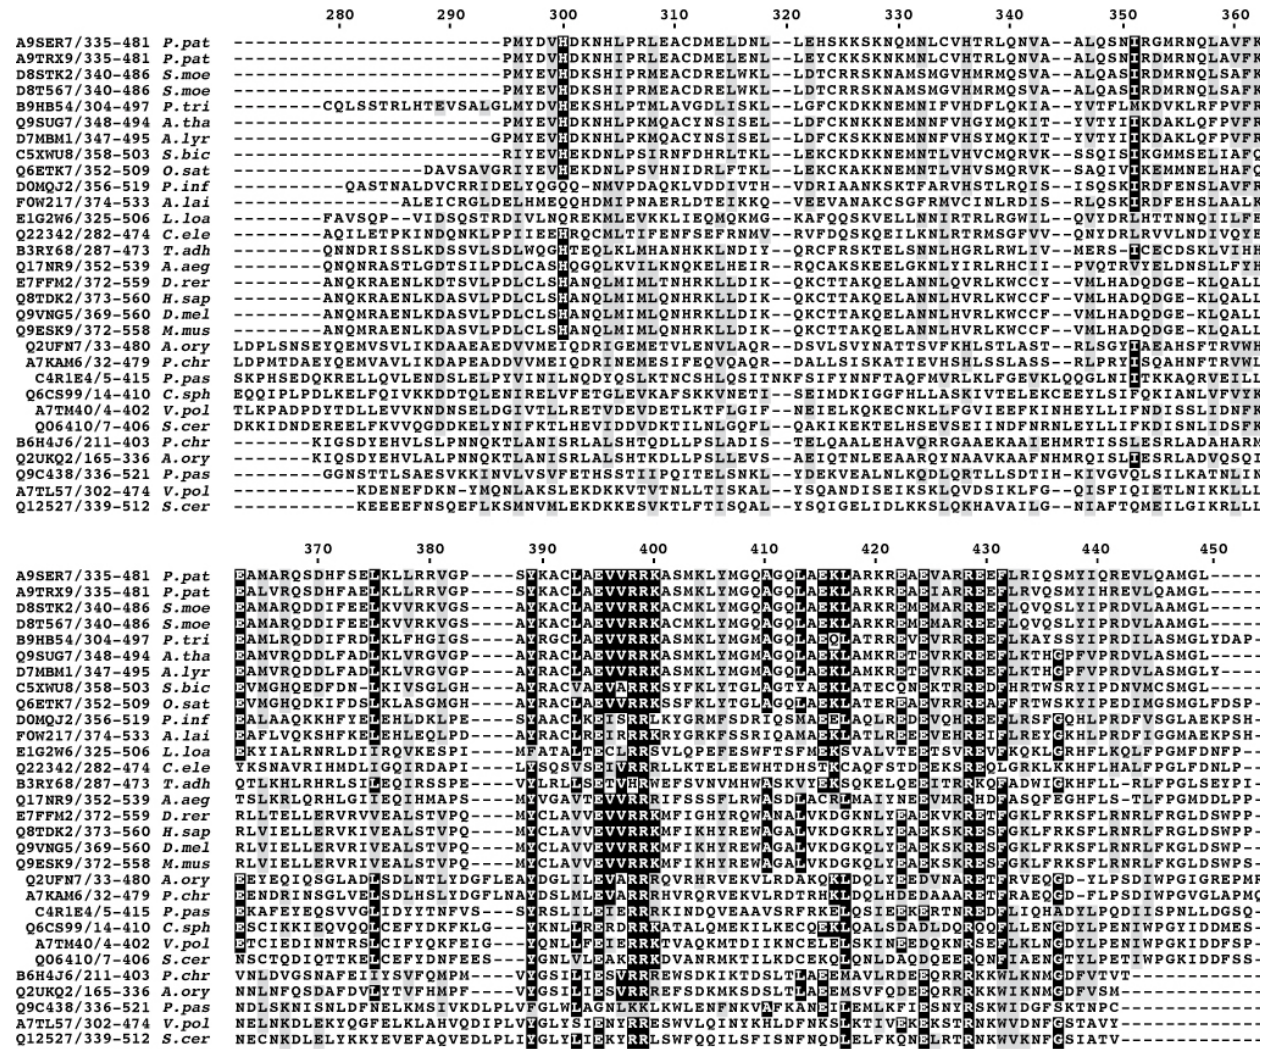

*musculus*, Q9VNG5 from *D. melanogaster*, Q8TDK2 from *H. sapiens*, Q2UFN7 and Q2UKQ2 from *A. oryzae*, A7KAM6 and B6H4J6 from *P. chrysogenum*, C4R1E4 and Q9C438 from *P. pastoris*, Q6CS99 from *C. sphaerica*, A7TM40 and A7TL57 from *V. polyspora*, Q06410 and Q12527 from *S. cerevisiae*.

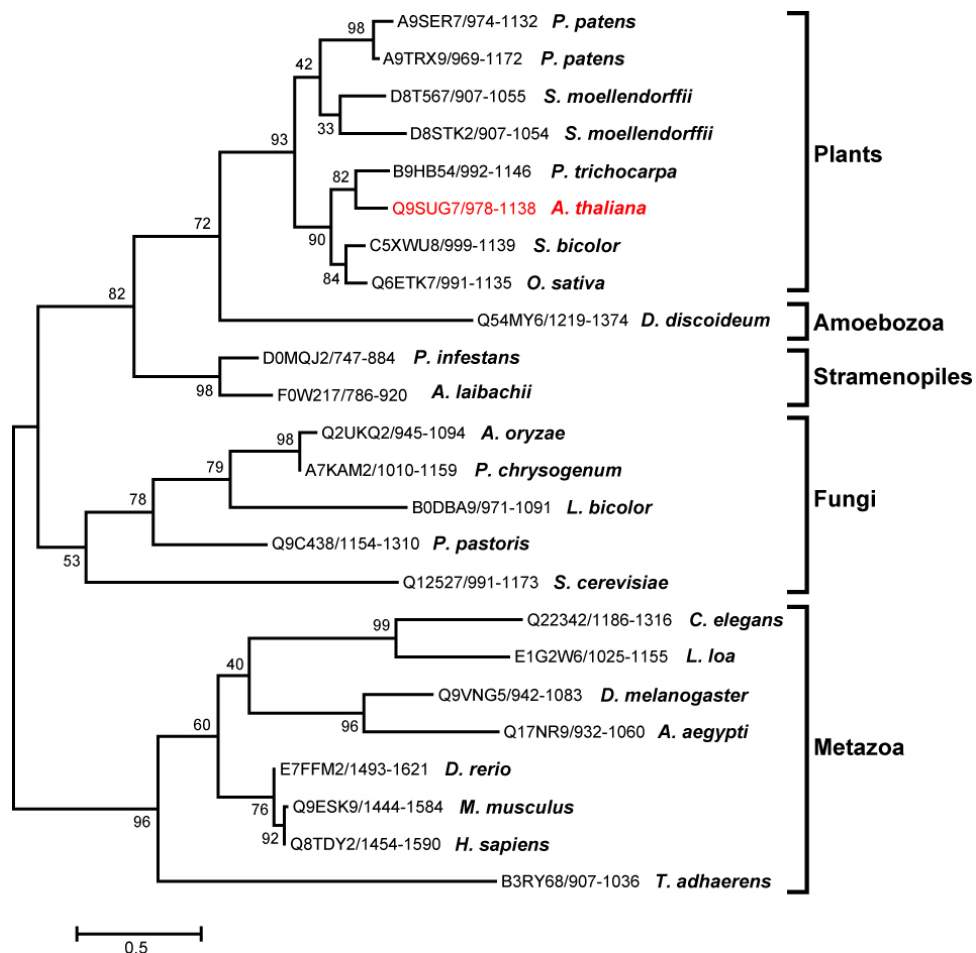

### Supplemental Figure 3. Phylogenetic Analysis of ATG11 Domain-Containing Proteins.

The amino acid sequences of predicted ATG11 domains were aligned by ClustalX (see Supplemental Figure 1 online) and used to construct a maximum likelihood tree based on the Jones/Taylor/Thornton method in MEGA 5.1. Sequence designations refer to the UniProt accession number and amino acid residue number of putative ATG11 domains, separated by a slash. The *Arabidopsis* member is highlighted in red.

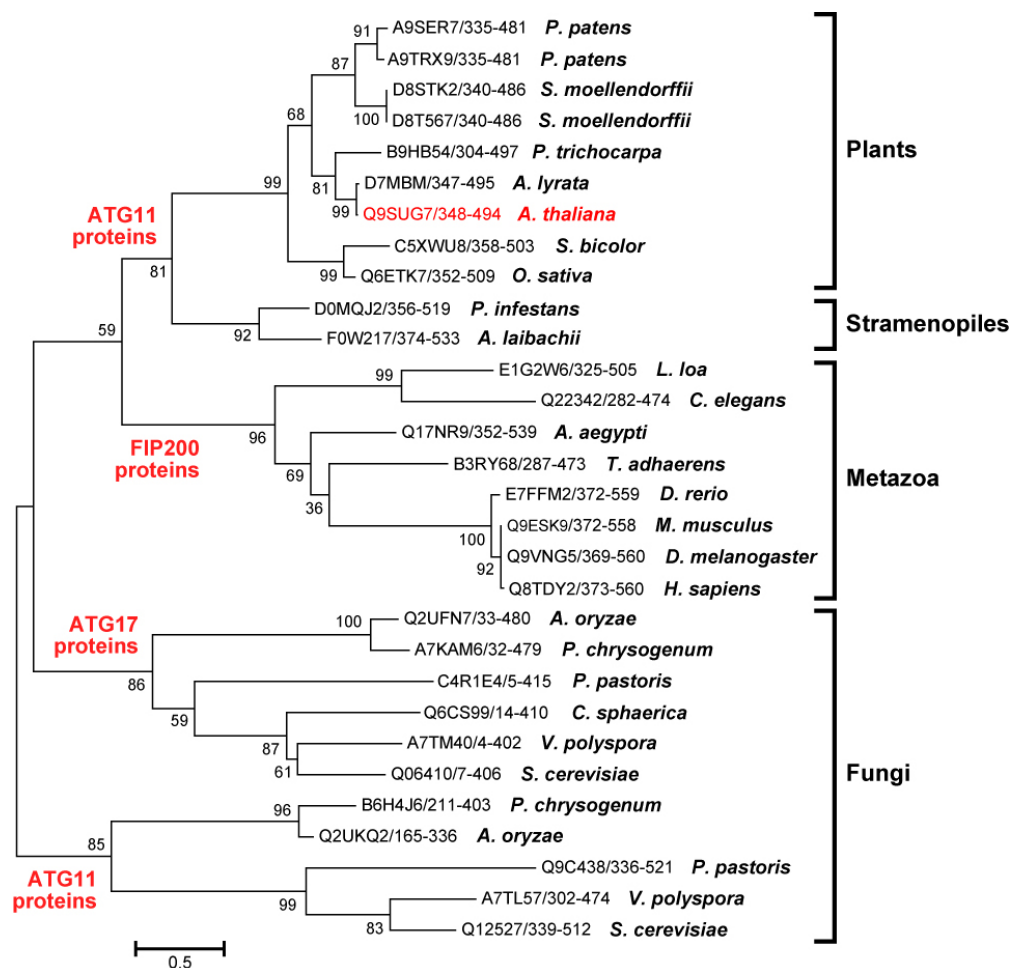

#### Supplemental Figure 4. Phylogenetic Analysis of ATG17 Domain-Containing Proteins.

The amino acid sequences of predicted ATG17 domains in ATG11, ATG17, and FIP200-related proteins were aligned by ClustalX (see Supplemental Figure 2 online) and used to construct a maximum likelihood tree based on Jones/Taylor/Thornton method method in MEGA 5.1. Sequence designations refer to the UniProt accession number and amino acid residue number of putative ATG17 domains, separated by a slash. The *Arabidopsis* member is highlighted in red.

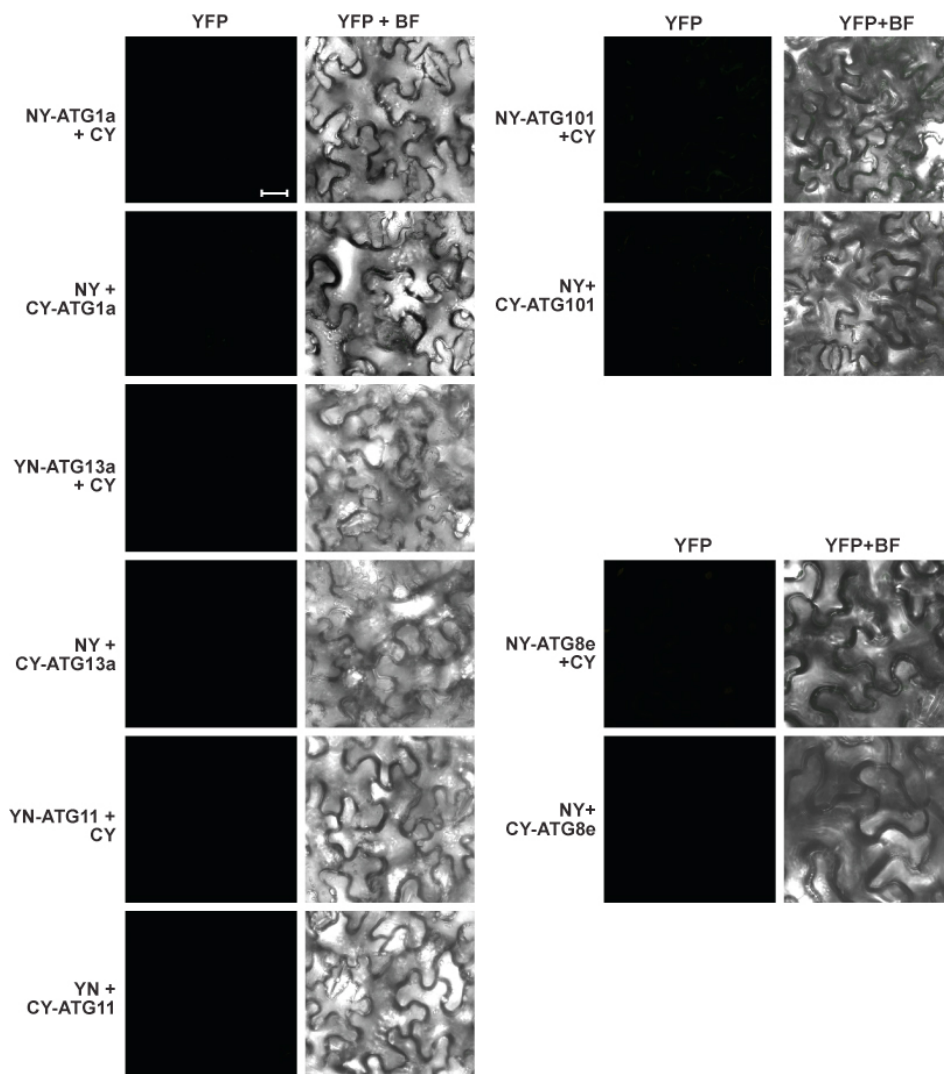

**Supplemental Figure 5. BiFC Controls Used to Examine the *in Planta* Interactions of ATG11, ATG101, or ATG8e with Other Components of the ATG1/13 Kinase Complex.**

The indicated combinations fused to the N- or C-terminal fragments of YFP (NY and CY, respectively) were co-expressed in *N. benthamiana* leaf epidermal cells. Confocal fluorescence microscopy images were captured 36-48 hr after transfection. The comparative bright field (BF) image is included next to each picture. Scale bar = 10  $\mu$ m.

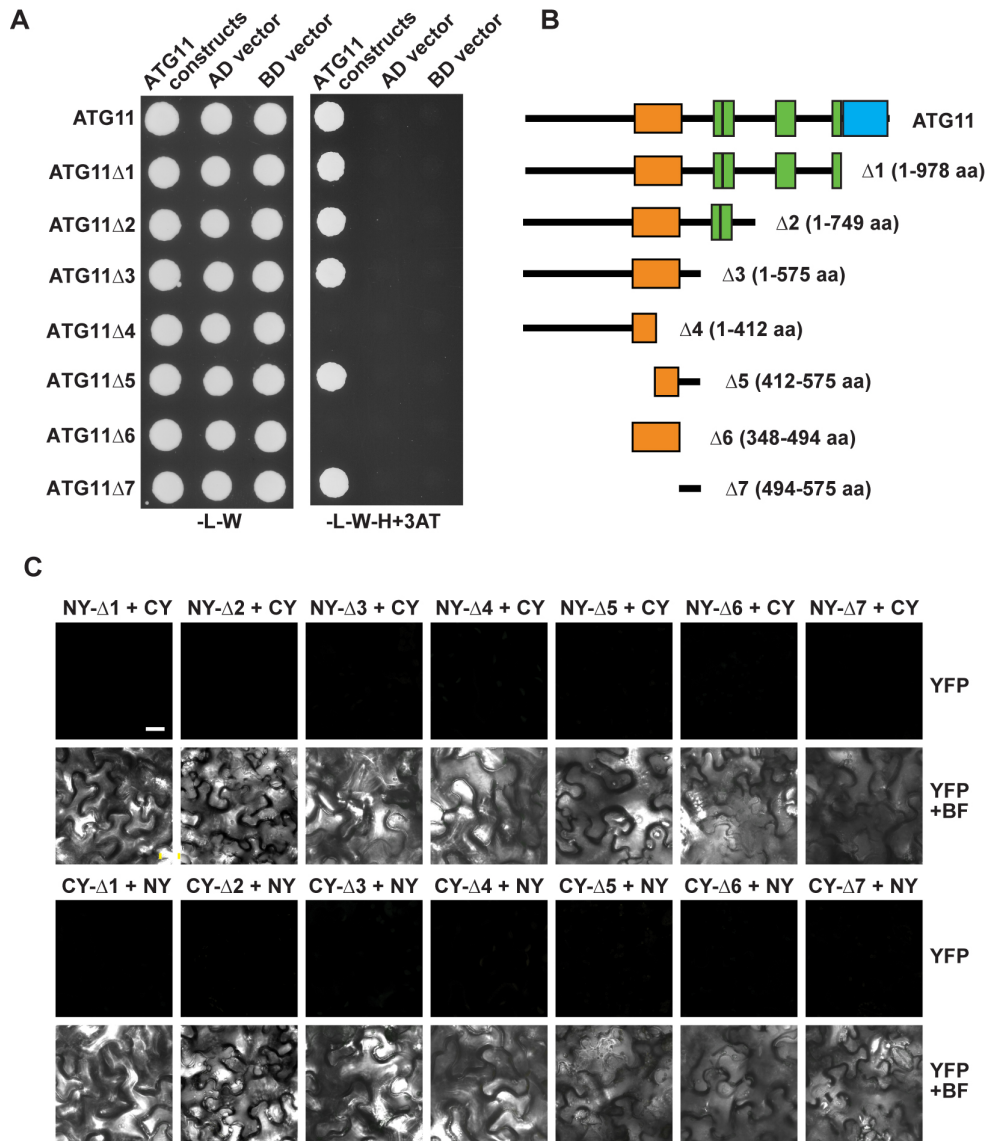

**Supplemental Figure 6. Y2H and BiFC Controls Used to Map the ATG11 Dimerization Region.**

**(A)** Full-length ATG11 and various truncated constructs were designed as N-terminal fusions to either the GAL4 activating (AD) or binding (BD) domains and co-transformed in yeast on selection medium lacking Trp and Leu or lacking Trp, Leu, and His and containing 3-amino-1,2,4-triazole (3AT).

**(B)** Diagram of the ATG11 truncations used in panels (A) and (C).

**(C)** BiFC of the ATG11 truncations. The indicated combinations were fused to the N- or C-terminal fragments of YFP (NY and CY, respectively) and co-expressed in *N. benthamiana* leaf epidermal cells. Confocal fluorescence microscopy images were captured 36-48 hr after transfection. The comparative bright field (BF) image is included below each picture. Scale bar = 10  $\mu$ m.

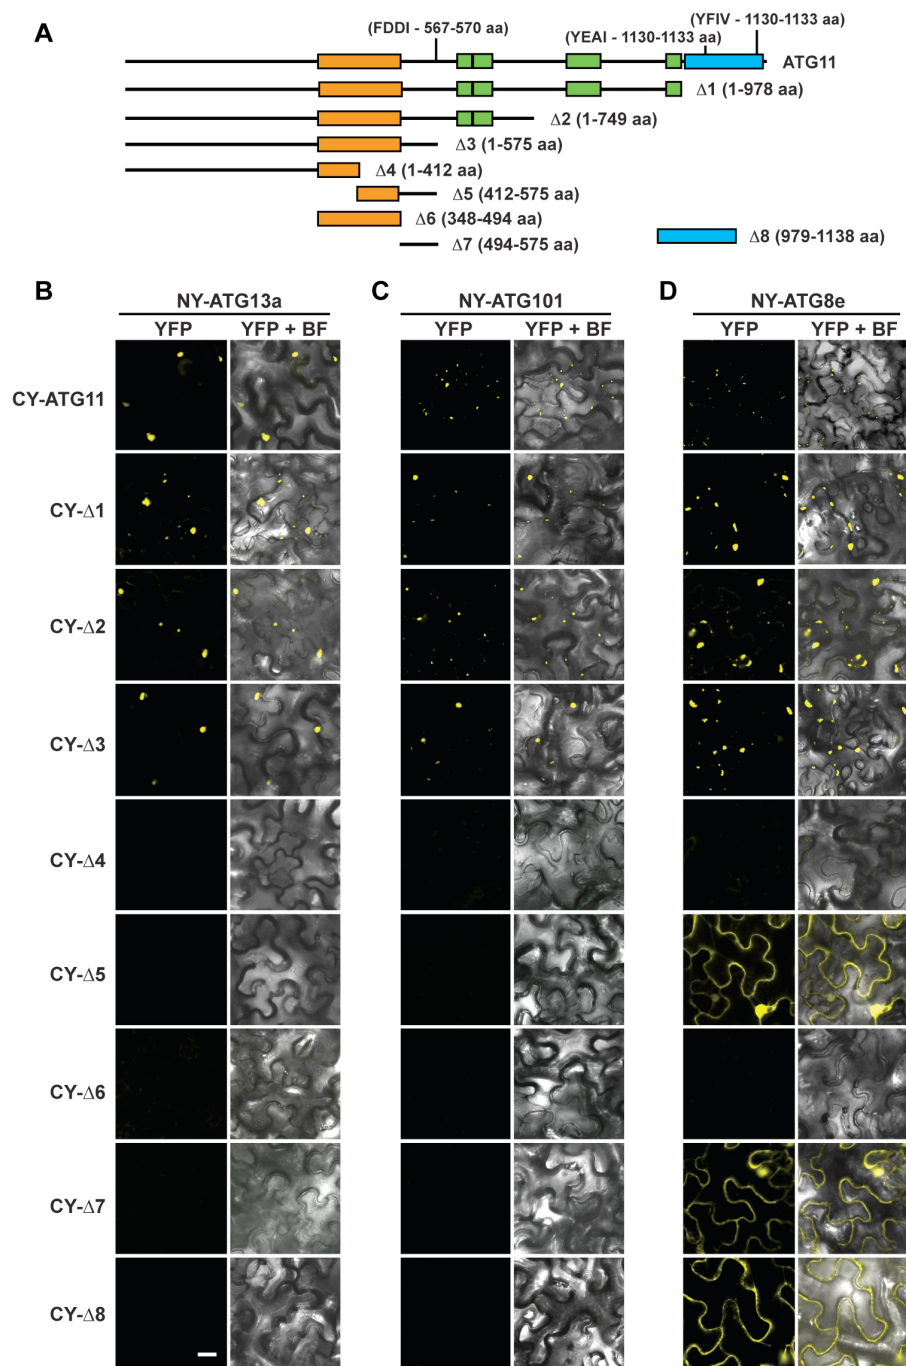

**Supplemental Figure 7. BiFC Mapping of the Interaction Site(s) Between ATG11 and ATG13a, ATG101, or ATG8e.**

**(A)** Diagram of the ATG11 truncations used for BiFC in panels (B-D). Possible AIM sequences are identified. Whereas the FDDI and YFIV AIM sequences are relatively conserved within ATG11 family, the YEAI possible AIM sequence is more degenerate.

**(B)** BiFC of the ATG11 truncations with full-length ATG13a.

**(C)** BiFC of the ATG11 truncations with full-length ATG101.

**(D)** BiFC of the ATG11 truncations with full-length ATG8e.

The indicated combinations were fused to the N- or C-terminal fragments of YFP (NY and CY, respectively) and co-expressed in the *N. benthamiana* leaf epidermal cells. Confocal microscopic images were captured 36-48 hr after transfection. The comparative bright field (BF) image is included next to each picture. Scale bar = 10  $\mu$ m.

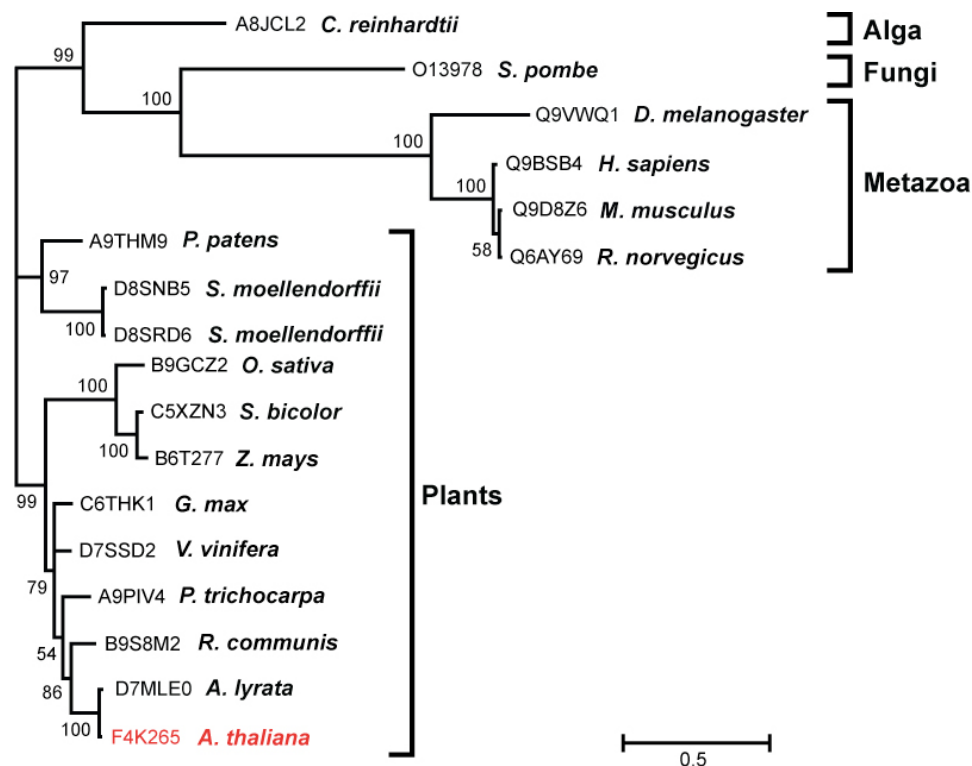

### Supplemental Figure 8. Phylogenetic Analysis of ATG101 Proteins.

The amino acid sequences of predicted ATG101 proteins were aligned by ClustalX (see Supplemental Figure 9 online) and used to construct a maximum likelihood tree based on Jones/Taylor/Thornton method in MEGA 5.1. Sequence designations refer to the UniProt accession number (see Supplemental Table S5 online). The *Arabidopsis* member is highlighted in red.



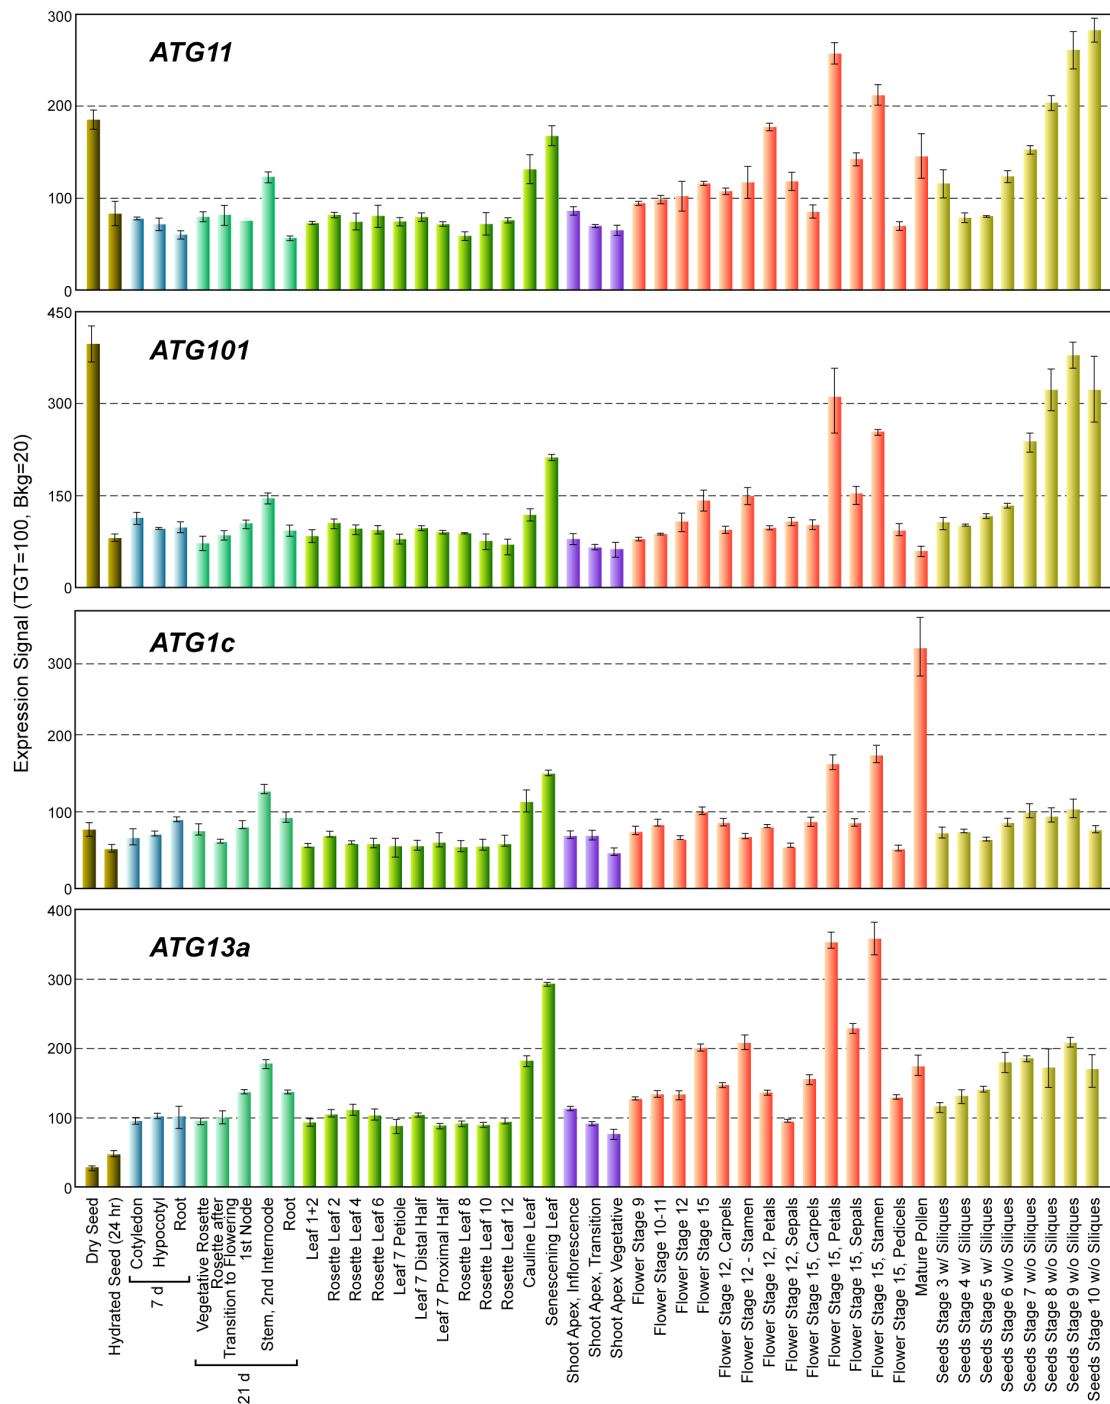

**Supplemental Figure 10. Expression of *ATG11*, *ATG101*, *ATG1c*, and *ATG13a* in *Arabidopsis* Tissues at Various Stages of Development.**

Normalized expression levels for *ATG11*, *ATG101*, *ATG1c*, and *ATG13a* were obtained from the eFP Browser ([http://bar.utoronto.ca/efp\\_arabidopsis/cgi-bin/efpWeb.cgi](http://bar.utoronto.ca/efp_arabidopsis/cgi-bin/efpWeb.cgi)) using the Gene Chip Operating Software and the Affimetrix 24K *Arabidopsis* DNA microarray. TGT, target. Bkg, background. Similar tissues and/or developmental stages are clustered by the various colors.

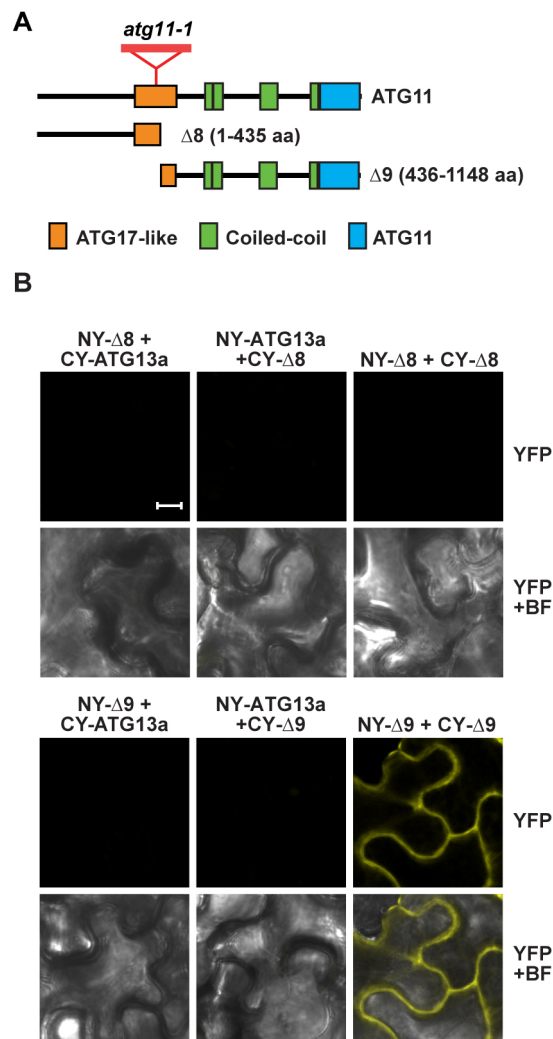

**Supplemental Figure 11. Truncated Transcripts Possibly Generated 5' and 3' to the T-DNA Insertion Site in *atg11-1* do not Generate Interaction-Competent ATG11 Proteins Even if Expressed.**

**(A)** Diagram of the *ATG11* gene showing the position of the *atg11-1* T-DNA insertion within codon 436. Positions of the signature ATG17-like, coiled coil, and ATG11 domains are indicated.

**(B)** BiFC of the possible N-terminal and C-terminal fragments of ATG11 (residues 1-435 and 436-1148) in *atg11-1* plants with themselves or with full-length ATG13a. The  $\Delta 8$  and  $\Delta 9$  coding regions upstream and downstream of the T-DNA insertion site were fused to the N- (NY) and C-terminal (CY) fragments of YFP, expressed in *N. benthamiana* leaf cells, and then assayed by fluorescence confocal microscopy. Scale bar = 10  $\mu$ m.

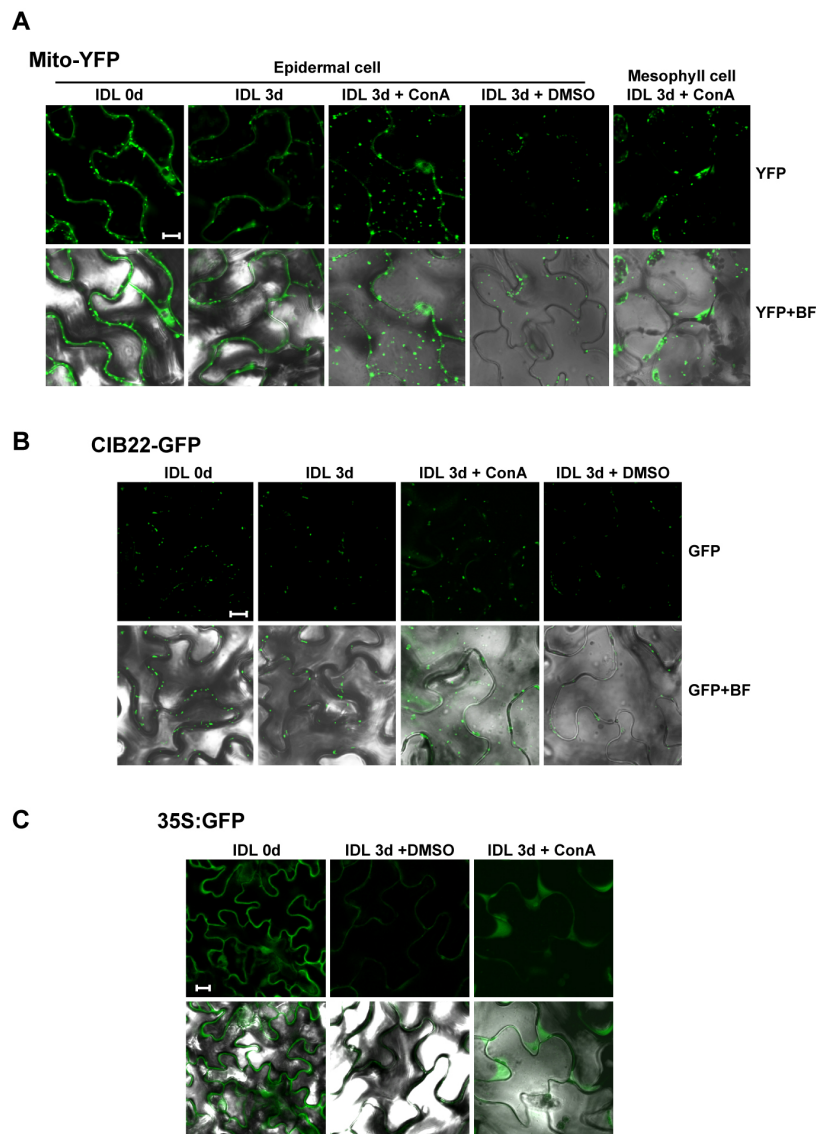

**Supplemental Figure 12. Association of the Mitochondrial Markers Mito-YFP and CIB22-GFP with Autophagic Bodies during IDL-Induced Senescence.**

Four-week-old wild-type plants expressing Mito-YFP **(A)**, CIB22-GFP **(B)** and free GFP **(C)** were subjected to IDL senescence for 3 d without or with a 20 hr pretreatment with 1  $\mu$ M ConA or an equivalent volume of DMSO. Leaf epidermal and mesophyll cells from the 3rd and 4th rosette leaves were imaged by confocal fluorescence microscopy. The comparative bright field (BF) image is included below each picture. Scale bar = 10  $\mu$ m.

| Supplemental Table 1.<br><i>Arabidopsis</i> ATG Genes Co-expressed with ATG11 |       |      |           |           |
|-------------------------------------------------------------------------------|-------|------|-----------|-----------|
| Rank                                                                          | MR    | COR  | Locus     | Gene Name |
| 2                                                                             | 6.8   | 0.62 | At5g54730 | ATG18f    |
| 23                                                                            | 31.3  | 0.58 | At2g31260 | ATG9      |
| 27                                                                            | 37.1  | 0.49 | At2g37840 | ATG1c     |
| 45                                                                            | 64.8  | 0.55 | At1g54710 | ATG18h    |
| 58                                                                            | 76.9  | 0.54 | At5g66930 | ATG10i    |
| 62                                                                            | 79.0  | 0.55 | At3g06420 | ATG8h     |
| 71                                                                            | 85.8  | 0.52 | At2g45170 | ATG8e     |
| 119                                                                           | 126.2 | 0.51 | At3g62770 | ATG18a    |
| 144                                                                           | 150.3 | 0.49 | At5g45900 | ATG7      |
| 150                                                                           | 158.4 | 0.47 | At3g53930 | ATG1b     |
| 209                                                                           | 222.5 | 0.46 | At5g17290 | ATG5      |
| 212                                                                           | 224.5 | 0.47 | At1g62040 | ATG8c     |
| 268                                                                           | 273.1 | 0.41 | At3g61710 | ATG6      |
| 272                                                                           | 276.5 | 0.46 | At1g54210 | ATG12a    |
| 288                                                                           | 286.7 | 0.45 | At4g04620 | ATG8b     |

| Supplemental Table 2. Top 20 <i>Arabidopsis</i> Genes Co-expressed with ATG11 |      |      |           |                                              |
|-------------------------------------------------------------------------------|------|------|-----------|----------------------------------------------|
| Rank                                                                          | MR   | COR  | Locus     | Gene Name                                    |
| 1                                                                             | 4.4  | 0.67 | At3g43230 | FYVE Zn finger family protein                |
| 2                                                                             | 6.8  | 0.62 | At5g54730 | ATG18f                                       |
| 3                                                                             | 9.1  | 0.53 | At5g14420 | RGLG2 (RING Ub ligase)                       |
| 4                                                                             | 9.4  | 0.58 | At1g01770 | unknown                                      |
| 5                                                                             | 9.5  | 0.49 | At5g59430 | TRP1 (Telomeric Repeat-Binding Protein)      |
| 6                                                                             | 15.5 | 0.53 | At5g66810 | unknown                                      |
| 7                                                                             | 17.7 | 0.61 | At1g29760 | Putative Adipose Regulatory Protein (Seipin) |
| 8                                                                             | 17.8 | 0.55 | At1g17145 | RING Ub ligase                               |
| 9                                                                             | 18.3 | 0.59 | At2g38410 | ENTH/VHS/GAT family protein                  |
| 10                                                                            | 18.8 | 0.57 | At5g13010 | EMB3011 (Embryo Defective)                   |
| 11                                                                            | 21.2 | 0.48 | At5g27650 | Tudor/PWWP/MBT family protein                |
| 12                                                                            | 21.6 | 0.61 | At2g42890 | AML2 (Arabidopsis MEI2-Like)                 |
| 13                                                                            | 21.6 | 0.57 | At5g04040 | SDP1 (Sucrose-Dependent)                     |
| 14                                                                            | 22.4 | 0.57 | At4g34370 | ARI1 (Ariadne) RING Ub ligase                |
| 15                                                                            | 24.2 | 0.59 | At2g31130 | unknown                                      |
| 16                                                                            | 26.2 | 0.52 | At4g11860 | DUF544 (Domain of Unknown Function)          |
| 17                                                                            | 26.5 | 0.55 | At4g33240 | FAB1a (Forms Aploid & Binucleate Cells)      |
| 18                                                                            | 27.5 | 0.57 | At5g16680 | FYVE Zn finger family protein                |
| 19                                                                            | 27.5 | 0.56 | At5g23340 | RNI-like family protein                      |
| 20                                                                            | 29.4 | 0.60 | At1g22930 | TCP1 (T-Complex Protein)                     |

\* Associated with autophagy and/or endomembrane vesicle trafficking.

**Supplemental Tables 1 and 2. Co-expression of ATG11 with Genes Encoding Other Components of the ATG8-Mediated Autophagic Pathway (Table 1) and with Other *Arabidopsis* Genes (Table 2).**

Potentially co-expressed genes were identified from the ATTED-II database using the CoexSearch function. The rank, mutual rank (MR), correlation coefficient (COR), *A. thaliana* Col-0 locus identifier, and gene name/prediction are indicated. Red asterisks in Supplemental Table 2 identify proteins that are known or are predicted to participate in autophagy and/or endomembrane vesicle trafficking.

**Supplemental Table 3. Oligonucleotide Primers Used in This Study**

ATG11 RT-PCR Primers

Primer 1: ATGAGCGGAAGCTTCACTGAGAGTTT  
Primer 2: GTCGAGGTCAAGCGCAAGGTA  
Primer 3: TCATGCACTTCGTACATAGGACCCAG  
Primer 4: GCAACATTGACATCAGACTGAGTAGG  
Primer 5: CTCATATTCAAATTGTGGGCCTAA  
Primer 6: TTAGGCCCAACAATTTGAATATGAG  
Primer 7: AATAATTCCTCCCGGTGTTTG

ATG11 Genotyping Primers

*atg11-1* RP: AAGTGTCTCATCTCTGCGTC  
*atg11-1* LP: TGCATTTGTTTTTCCTTGAGC  
*atg11-2* RP: AATAATTCCTCCCGGTGTTTG  
*atg11-2* LP: AAGCTTCTCGAAGAATCCCAG

Primers used to generate full-length and truncated form ATG11

ATG11 full-length cDNA Forward: ATGAGCGGAAGCTTCACTGAGAGTTT  
ATG11 full-length cDNA Reverse: CGTGGCCATATAACTGAAAGCTGA  
ATG11 (1-978aa) Reverse: TCAAGCAATCCCACTACCAGCACA  
ATG11 (1-794aa) Reverse: TCAAGAGGAATCCACCATATTCTC  
ATG11 (1-575aa) Reverse: TCATTGAGAGGCTGCTAGGATATCAT  
ATG11 (1-412aa) Reverse: TCAGCCTCTCTAAAAACGGGA  
ATG11 (412-575aa) Forward: CACCTTTCCCGTTTTTAGAGAGGCAAT  
ATG11 (494-575aa) Forward: CACCACTCCTACTCAGTGTGATGTCAAT  
ATG11 (348-494aa) Forward: CACCGATGCTGTTTCAGCCCTGGGTCCT  
ATG11 (348-494aa) Reverse: TCAAGGAGTATCGTATAAACCCATTGA  
ATG11 (1-435aa) Reverse: TCACTATAAGCGGGGCCAACACCACG  
ATG11 (436-1148aa) Forward: CACCGGCCTGTCTTGCAAGAGGTG

Primers used to generate full-length ATG101 cDNA:

Forward: ATGAATTGCGAAGTTTGTCAGCTAA  
Reverse: GGAATTTAGCCGAGCATTGATGGA

ATG1a AIM mutant QuickChange primers:

Forward: CTCATAGAGAGAGAGGCTGTTCTTGC  
Reverse: GCAGAAGGACGGTTTGCAAGAACAG

UBC9

AtUBC9\_F3: CCGTTGCGGAAGACATGTTTCATT  
AtUBC9\_R2: TAGGGCTCTTCCTTAAGGACAGTA

Primers used for qRT-PCR analysis of ATG11 transcript in *atg11-1* mutant

P8: CTGCAAGTGACAGGGAAGTG  
P9: GATGCATCATCCAAGGGATG  
P10: GGGACAGAGACATAATAATAAG  
P11: GAAACACAAGAGACCTCATC

T-DNA Left Border Primers

SAIL-LB1: GCCTTTTCAGAAATGGATAAATAGCCTTGCTTCCTTGCTT  
GK-TDNA: ATAATAACGCTGCGGACATCTACATTTT

**Supplemental Table 4. Species Names, Data Sources, and Domain Positions for Various ATG11, ATG17, and FIP200 Proteins Used for the Phylogenetic Analysis**

| Protein | Organism                          | Uniprot ID | ATG11 Domain Position (AA) | ATG17 domain position (AA) |
|---------|-----------------------------------|------------|----------------------------|----------------------------|
| ATG11   | <i>Physcomitrella patens</i>      | A9SER7     | 974-1132                   | 335-481                    |
| ATG11   | <i>Physcomitrella patens</i>      | A9TRX9     | 969-1127                   | 335-481                    |
| ATG11   | <i>Selaginella moellendorffii</i> | D8STK2     | 907-1054                   | 340-486                    |
| ATG11   | <i>Selaginella moellendorffii</i> | D8T567     | 907-1055                   | 340-486                    |
| ATG11   | <i>Populus trichocarpa</i>        | B9HB54     | 992-1146                   | 304-497                    |
| ATG11   | <i>Arabidopsis thaliana</i>       | Q9SUG7     | 978-1138                   | 348-494                    |
| ATG11   | <i>Arabidopsis lyrata</i>         | D7MBM1     | 978-1138                   | 348-494                    |
| ATG11   | <i>Sorghum bicolor</i>            | C5XWU8     | 999-1139                   | 358-503                    |
| ATG11   | <i>Oryza sativa</i>               | Q6ETK7     | 991-1135                   | 352-509                    |
| ATG11   | <i>Dictyostelium discoideum</i>   | Q54MY6     | 1219-1374                  | 308-497                    |
| ATG11   | <i>Phytophthora infestans</i>     | D0MQJ2     | 747-884                    | 356-519                    |
| ATG11   | <i>Albugo laibachii</i>           | F0W217     | 786-920                    | 374-533                    |
| ATG11   | <i>Aspergillus oryzae</i>         | Q2UKQ2     | 945-1094                   | 165-336                    |
| ATG17   |                                   | Q2UFN7     | NA                         | 33-480                     |
| ATG11   | <i>Penicillium chrysogenum</i>    | B6H4J6     | 1010-1159                  | 211-403                    |
| ATG17   |                                   | A7KAM6     | NA                         | 32-479                     |
| ATG11   | <i>Laccaria bicolor</i>           | B0DBA9     | 971-1091                   | 332-501                    |
| ATG11   | <i>Pichia pastoris</i>            | Q9C438     | 1154-1310                  | 336-521                    |
| ATG17   |                                   | C4R1E4     | NA                         | 5-415                      |
| ATG11   | <i>Saccharomyces cerevisiae</i>   | Q12527     | 991-1173                   | 339-512                    |
| ATG17   |                                   | Q06410     | NA                         | 7-406                      |
| ATG17   | <i>Candida sphaerica</i>          | Q6CS99     | NA                         | 14-410                     |
| ATG11   | <i>Vanderwaltozyma polyspora</i>  | A7TL57     | 1045-1216                  | 302-474                    |
| ATG17   |                                   | A7TM40     | NA                         | 4-402                      |
| FIP200  | <i>Caenorhabditis elegans</i>     | Q22342     | 1186-1316                  | 282-474                    |
| FIP200  | <i>Loa loa</i>                    | E1G2W6     | 1025-1155                  | 325-506                    |
| FIP200  | <i>Aedes aegypti</i>              | Q17NR9     | 932-1060                   | 352-539                    |
| FIP200  | <i>Trichoplax adhaerens</i>       | B3RY68     | 907-1036                   | 287-473                    |
| FIP200  | <i>Danio rerio</i>                | E7FFM2     | 1493-1622                  | 372-559                    |
| FIP200  | <i>Mus musculus</i>               | Q9ESK9     | 1444-1584                  | 372-558                    |
| FIP200  | <i>Drosophila melanogaster</i>    | Q9VNG5     | 942-1083                   | 369-560                    |
| FIP200  | <i>Homo sapiens</i>               | Q8TDY2     | 1454-1590                  | 373-560                    |

**Supplemental Table 5. Species Names and Data Sources for ATG101 Proteins Used for the Phylogenetic Analysis.** The amino acid length of each protein is listed on the right.

| Protein | Organism                          | Uniprot ID | Protein length |
|---------|-----------------------------------|------------|----------------|
| ATG101  | <i>Chlamydomonas reinhardtii</i>  | A8JCL2     | 259 aa         |
| Mug66   | <i>Schizosaccharomyces pombe</i>  | O13978     | 184 aa         |
| ATG101  | <i>Drosophila melanogaster</i>    | Q9VWQ1     | 218 aa         |
| ATG101  | <i>Homo sapiens</i>               | Q9BSB4     | 218 aa         |
| ATG101  | <i>Mus musculus</i>               | Q9D8Z6     | 218 aa         |
| ATG101  | <i>Rattus norvegicus</i>          | Q6AY69     | 218 aa         |
| ATG101  | <i>Physcomitrella patens</i>      | A9THM9     | 210 aa         |
| ATG101  | <i>Selaginella moellendorffii</i> | D8SNB5     | 217 aa         |
| ATG101  | <i>Selaginella moellendorffii</i> | D8SRD6     | 217 aa         |
| ATG101  | <i>Oryza sativa</i>               | B9GCZ2     | 208 aa         |
| ATG101  | <i>Sorghum bicolor</i>            | C5XZN3     | 189 aa         |
| ATG101  | <i>Zea mays</i>                   | B6T277     | 213 aa         |
| ATG101  | <i>Glycine max</i>                | C6THK1     | 218 aa         |
| ATG101  | <i>Vitis vinifera</i>             | D7SSD2     | 218 aa         |
| ATG101  | <i>Populus trichocarpa</i>        | A9PIV4     | 216 aa         |
| ATG101  | <i>Ricinus communis</i>           | B9S8M2     | 205 aa         |
| ATG101  | <i>Arabidopsis lyrata</i>         | D7MLE0     | 216 aa         |
| ATG101  | <i>Arabidopsis thaliana</i>       | F4K265     | 215 aa         |
